# Supplementary material for: Comparative Transcriptomics Uncovers Upstream Factors Regulating BnFAD3 Expression and Affecting Linolenic Acid Biosynthesis in Yellow-Seeded Rapeseed (Brassica napus L.)
Source: MDPI journal article supplement (doi:10.3390/plants13060760), 2024-03-07
Supplement: s1 [file s1]

**Table S1** The primer sequences designed for the rapeseed genes used in RT-qPCR.

| Rapeseed gene | Forward prime          | Reverse prime            |
|---------------|------------------------|--------------------------|
| <i>Actin7</i> | CGCGCCTAGCAGCATGAA     | GTTGGAAAGTGCTGAGAGATGCA  |
| <i>FAD2</i>   | CCAGCTCAAGAAACATGG     | TACTTCCAGGAGAAGTAAGG     |
| <i>FAD3</i>   | CCTTGGTACAGAGGCAAG     | ACCAAGTGATAGTGAGGG       |
| <i>FAD6</i>   | GCAGACAGCTATGGATTCAA   | TCATCAATCTCAAACACCTCT    |
| <i>FAD7</i>   | ATCCAGACAGCGACTTGTT    | GGCAAAGGTCCAGACTTATC     |
| <i>TT8</i>    | ACTTCTCATGTCAACAACCCAC | ATCCATTGCGACGACGAAG      |
| <i>TT1</i>    | CTACAACAATCTTCAGATGC   | CAACGCAGCAGTAACAAGGG     |
| <i>TT2</i>    | GTAAACAGAGGAGCTTGG     | GCCTGGTCTCAAGTAGTTC      |
| <i>TT12</i>   | GTCATGCTATGTTTGGAGAT   | GCATATCCCAGTTCAAGTAATACA |
| <i>TT16</i>   | TGCTCACATCGGTCTCATC    | GAGCTCAAGCTTACATGTCTC    |
| <i>TTG1</i>   | TCCACCATCATCTACGAGAG   | CGCAATGCCAATCCAAT        |
| <i>LODX</i>   | GAAGTACGCAAACGATCAAG   | GAAGGTCAAAGCGCTTACAT     |
| <i>BAN</i>    | TTAACCGATGAAGGGAGTTT   | GGTTTGATCATGTCTTTCTC     |
| <i>FLS</i>    | CTCAAGATTACAGGGAAGTGA  | AATAGCCTCACGACGTAAAC     |
| <i>DFR</i>    | GAAGATGACAGGATGGATGT   | GATCACCAATGTCGGGATAA     |
| <i>CHI</i>    | GAAATCGTCACAGGTTTCGT   | TCAGAGTCTGTGTAAATCCC     |
| <i>CHS</i>    | AAGCGCATGTGCGATAAG     | CCTAGCTTAGGGACTTCAAC     |
| <i>TT10</i>   | GCATTTGCTAAAGCACTCTC   | ATGGAACCTTCCTTAACCGTG    |
| <i>FUS3</i>   | TACTCCCCAAGAAAGCTGCG   | TGTTGTTTGGCCAGTACCTGT    |
| <i>LEC2</i>   | GGGTCACTTGGGAGGATTG    | TGTTATTGGACCAGTACTTGTAT  |
| <i>LEC1</i>   | ACAAGAACAAGAGTATCGTGC  | AAACCATTTCTCCTCCAAAGGC   |
| <i>ABI3</i>   | ATTGACGACCTCGAGACCT    | TATTCAAAGCCCTTTCCACG     |
| <i>NF-YC2</i> | TGGTGTGTGTGTGTGTTTAGA  | ATTCCACTCTGATAAGCACG     |
| <i>bZIP25</i> | CGTGTGTCTACTGTGGTG     | TGTCAAATGAGGGAGCATC      |
| <i>bZIP10</i> | AGAACAAGCTTGAGACTGAG   | ACCAAAGAGCCTTGAGTAAG     |
| <i>bZIP67</i> | AAAGAAGGCAAGAGGTGATG   | TAATCTACCACCCAGCACTA     |
| <i>L1L</i>    | TGAGCTCGTGGCTTTGAA     | ATCAAAAAGCTTCCCTGGATT    |
